# Supplementary material for: Converting non-neutralizing SARS-CoV-2 antibodies into broad-spectrum inhibitors
Source: PubMed Central journal article supplement (PMC9596371; doi:10.1038/s41589-022-01140-1), 2022-09-08
Supplement: 41589_2022_1140_MOESM1_ESM.pdf [file 41589_2022_1140_MOESM1_ESM.pdf]

---

**Supplementary information**

---

**Converting non-neutralizing SARS-CoV-2 antibodies into broad-spectrum inhibitors**

---

In the format provided by the authors and unedited

1 Supplementary Information:

2

3 Converting non-neutralizing SARS-CoV-2 antibodies into broad-spectrum  
4 inhibitors

5 Payton A.-B. Weidenbacher<sup>1,2</sup>, Eric Waltari<sup>3</sup>, Izumi de los Rios Kobara<sup>4</sup>, Benjamin N. Bell<sup>1,5</sup>,

6 Mary Kate Morris<sup>6</sup>, Ya-Chen Cheng<sup>1,7</sup>, Carl Hanson<sup>6</sup>, John E. Pak<sup>3</sup>, Peter S. Kim<sup>1,3,7</sup>

7 <sup>1</sup>Stanford ChEM-H, Stanford University, Stanford, CA 94305, <sup>2</sup> Department of Chemistry, Stanford University, Stanford, CA 94305,

8 <sup>3</sup> Chan Zuckerberg Biohub, San Francisco, CA 94158, <sup>4</sup> Stanford Immunology Program, Stanford University School of Medicine,

9 Stanford, CA 94305, <sup>5</sup> Department of Molecular and Cellular Physiology, Stanford University School of Medicine, Stanford,

10 California 94305, <sup>6</sup> California Department of Public Health, Richmond, California, USA, <sup>7</sup> Department of Biochemistry, School of

11 Medicine, Stanford University, Stanford, CA 94305

12

13 Supplementary note:

14 **Signal Peptide**

15 *Hexa-His tag*

16 **TEV Site**

17 ACE2

18

19 **CV10-ACE2 Fusion scFv**

20

21 **MGWSCILFLVATATGVHS**QVQLQESGPGLVKPSSETLSLTCNVSGGSISSYYWSWIRQP

22 PGKGLEWIGYIYYSGSTNYPNPSLKSRVTISVDTSKNQFSLKLSSVTAADTAVYYCARGFD

23 YWGQGTLLVTVSSASGGGGSGGGGSGGGGSEIVLTQSPGTLSPGERATLSCRASQSVS

1 SIYLAWYQQKPGQAPRLLIYGASSRATGIPDRFSGSGSGTDFTLTISRLEPEDFAVYYCQQ  
2 YAGSPWTFGQGTKVEIKGGSGSHHHHHHASTGGGSGGSPSQAGAAASEENLYFQGS LF  
3 VSNHAYGGSGGEARVSTIEEQAKTFLDKFNHEAEDLFYQSSLASWNYNTNITEENVQN  
4 MNNAGDKWSAFLKEQSTLAQMYPLQEIQNLTVKLQLQALQONGSSVLSEDKSKRLNTI  
5 LNTMSTIYSTGKVCNPDNPQECLLLEPGLNEIMANSLDYNERLWAWESWRSEV GKQLR  
6 PLYEEYVVLKNEMARANHYEDYGDYWRGDYEVNGVDGYDYSRGQLIEDVEHTFEEIK  
7 PLYEHLHAYVRAKLMNAYPSYISPIGCLPAHLLGDMWGRFWTNLYSLTVPGQKPNID  
8 VTDAMVDQAWDAQRIFKEAEKFFVSVGLPNMTQGFWENSMLTDPGNVQKAVCHPTA  
9 WDLGKGDFRILMCTKVTMDDFLTAHHEMGHIQYDMAYAAQPFLLRNGANEGFHEAV  
10 GEIMSLSAATPKHLKSIGLLSPDFQEDNETEINFLKQALTIVGTL PFTYMLEKWRWMVF  
11 KGEIPKDQWMKKWWEMKREIVGVVEPVPHDETYCDPASLFHVSNDYSFIRYYTRTLYQ  
12 FOFQEALCQAAKHEGPLHKCDISNSTEAGQKLFNMLRLGKSEPWTLAENNVGAKNMN  
13 VRPLLNYFEPLFTWLKDQNKNSFVGWSTDWSPYAD

14

15 **CV27-ACE2 Fusion scFv**

16

17 MGWSCILFLVATATGVHSQVQLVESGGGVVQPGRSLRLS CAASGFTFSSYAMHWVR  
18 QAPGKGLEWVALISYDGSNKYYADSVKGRFTISRDN SKNTLYLQMNSLRAEDTAVYYC  
19 ARSFGGSYYYGMDVWGQGTTVTASGGGGSGGGGSGGGGSQSALTQPASVSGSPGQSIT  
20 ISCTGTSSDVGGYNYVSWYQQHPGKAPKLMYDVS NRPSGVSNRFSGSKSGNTASLTIS  
21 GLQAEDEADYYCSSYTSSSTPYVFGTGTKVGGSGSHHHHHHASTGGGSGGSPSQAGAA  
22 ASEENLYFQGS LFVSNHAYGGSGGEARVSTIEEQAKTFLDKFNHEAEDLFYQSSLASWN  
23 YNTNITEENVQNMNNAGDKWSAFLKEQSTLAQMYPLQEIQNLTVKLQLQALQONGSSV

1 LSEDKSKRLNTILNTMSTIYSTGKVCNPDNPQECLLLEPGLNEIMANSLDYNERLWAW  
2 SWRSEVGKQLRPLYEEYVVLKNEMARANHYEDYGDYWRGDYEVNGVDGYDYSRGQL  
3 IEDVEHTFEEIKPLYEHLHAYVRAKLMNAYPSYISPIGCLPAHLLGDMWGRFWTNLYSL  
4 TVPFGQKPNIDVTDAMVDQAWDAQRIFKEAEKFFVSVGLPNMTQGFWENSMLTDPGN  
5 VQKAVCHPTAWDLGKGDFRILMCTKVTMDDFLTAHHEMGHIQYDMAYAAQPFLLRN  
6 GANEGFHEAVGEIMSLSAATPKHLKSIGLLSPDFQEDNETEINFLKQALTIVGTLPTFTYM  
7 LEKWRWMVFKGEIPKDQWMKKWWEMKREIVGVVEPVPHDETYCDPASLFHVSNDYS  
8 FIRYYTRTLYQFQFQEALCQAAKHGEPHKKCDISNSTEAGQKLFNMLRLGKSEPWTLAL  
9 ENVVGAKNMNVRPLLNYFEPLFTWLKDQNKNSFVGWSTDWSPYAD  
10  
11 **COVA2-14-ACE2 Fusion scFv**  
12  
13 MGWSCIILFLVATATGVHSQVQLVQSGAEVKKPGSSVKVCKASGGTFSSYAIIVWRQ  
14 APGQGLEWMGGIPIFGTANYAQKFQGRVTITTDSTAYMELSSLRSEDVAVYYCAR  
15 VRYDSSGGYEDYWGQGTLVTVSSASGGGGSGGGGSGGGGSEIVLTQSPATLSLSPGER  
16 ATLSCRASQSVSSYLAWYQQEPGQAPRLLIYDASNRAIGIPARFSGSGGTDFLTISLE  
17 PEDFAVYYCQRSNWPPMYTFGQGTKVEIKGGSGSHHHHHHASTGGGSGGSPGQAGA  
18 AASEENLYFQGSFVSNHAYGGSGGEARVSTIEEQAKTFLDKFNHEAEDLFYQSSLASW  
19 NYNTNITEENVQNMNAGDKWSAFLKEOSTLAQMYPLQEIQNLTVKLQLQALQONGSS  
20 VLSEDKSKRLNTILNTMSTIYSTGKVCNPDNPQECLLLEPGLNEIMANSLDYNERLWAW  
21 ESWRSEVGKQLRPLYEEYVVLKNEMARANHYEDYGDYWRGDYEVNGVDGYDYSRGQ  
22 LIEDVEHTFEEIKPLYEHLHAYVRAKLMNAYPSYISPIGCLPAHLLGDMWGRFWTNLYS  
23 LTVPFGQKPNIDVTDAMVDQAWDAQRIFKEAEKFFVSVGLPNMTQGFWENSMLTDPG

1 NVQKAVCHPTAWDLGKGDFRILMCTKVTMDDFLTAHHEMGHIQYDMAYAAQPFLLR  
2 NGANEGFHEAVGEIMSLSAATPKHLKSIGLLSPDFQEDNETEINFLKQALTIVGTLPFTY  
3 MLEKWRWMVFKGEIPKDQWMKKWWEMKREIVGVVEPVPHDETYCDPASLFHVSNDY  
4 SFIRYYTRTLYQFOFQEALCQAAKHEGPLHKCDISNSTEAGQKLFNMLRLGKSEPWTLA  
5 LENVVGAKNMNVRPLLNYFEPLFTWLKDQNKNSFVGWSTDWSPYAD  
6  
7 **COV2-2449-ACE2 Fusion scFv**  
8  
9 MGWSCILFLVATATGVHSQVQLVESGGGVVQPGRSLRLSCATSGFTFSSFALHWVRQ  
10 APGKGLEWVTVISDDGNNKYYVDSVKGRFTISRDN SKNTLFLQMNSLRVEDTAIYYCA  
11 RASYN SNWSIGEYFRDWGQGT LVTVSSASGGGGSGGGGSGGGGSDIVMTQSPDSLAVS  
12 LGERATINCKSSQSLLYTSNNKNYLAWYQQKPGQPPKLLIYWASTRESGVPDRFSGSGS  
13 GTDFTLTISSLQAEDVAVYYCQQYYSPPWTFGQGTKVEIKGGSGSHHHHHHASTGGGS  
14 GGPSGQAGAAASEENLYFQGS L FVSNHAYGGSGGEARVSTIEEQAKTFLDKFNHEAED  
15 LFYQSSLASWNYNTNITEENVQNMNAGDKWSAFLKEOSTLAQMYPLQEIQNLTVKLO  
16 LQALQQNGSSVLSEDKSKRLNTILNTMSTIYSTGKVCNPDNPQECLLLEPGLNEIMANSL  
17 DYNERLWAWESWRSEVGKQLRPLYEEYVVLKNEMARANHYEDYGDYWRGDYEVNG  
18 VDGYDYSRGQLIEDVEHTFEEIKPLYEHLHAYVRAKLMNAYPSYISPIGCLPAHLLGDM  
19 WGRFWTNLYSLTVPFGQKPNIDVTDAMVDQAWDAQRIFKEAEKFFVSVGLPNMTQGF  
20 WENSMLTDPGNVQKAVCHPTAWDLGKGDFRILMCTKVTMDDFLTAHHEMGHIQYDM  
21 AYAAQPFLLRNGANEGFHEAVGEIMSLSAATPKHLKSIGLLSPDFQEDNETEINFLKQA  
22 LTIVGTLPFTYMLEKWRWMVFKGEIPKDQWMKKWWEMKREIVGVVEPVPHDETYCDP

1 ASLFHVSNDYSFIRYYTRTLYQFQFQEALCQAAKHEGPLHKCDISNSTEAGQKLFNMLR  
2 LGKSEPWTLAENVVGAKNMNV RPLLNYFEPLFTWLKDQNKNSFVGWSTDWSPYAD  
3  
4 **COV2-2143-ACE2 Fusion scFv**  
5  
6 MGWSCILFLVATATGVHSEVQLVESGGGLVQPGGSLRLSCAASGFTVSSNYMSWVR  
7 QAPGKGLEWVSVIYSAGSTYYADSVKGRFSISRDKSKNTLYLQMNSLRAEDTAVYYCA  
8 KEGGSGSLRYYYYGMDVWGQGTTVTVSSASGGGGSGGGGSQSVVTQPPSASG  
9 TPGQRTVITCSGSSSNIGYNIVN WYQQLPGTAPKLLIYSNNQRPSGVPDRFSGSKSGTSAS  
10 LSISGLQSEDEADYYCAA WDDSLNGYVFGTGTKVTVLGGSGSHHHHHHASTGGGSGGP  
11 SGQAGAAASEENLYFQGS LFVSNHAYGGSGGEARVSTIEEQAKTFLDKFNHEAEDLFY  
12 QSSLASWNYNTNITEENVQNMNAGDKWSAFLKEQSTLAQMYPLQEIQNLTVKLQLO  
13 ALQONGSSVLSEDKSKRLNTILNTMSTIYSTGKVCNPDNPQECLLLEPGLNEIMANSLDY  
14 NERLWAWESWRSEVGKQLRPLYEEYVVLKNEMARANHYEDYGDYWRGDYEVNGVD  
15 GVDYSRGQLIEDVEHTFEEIKPLYEHLHAYVRAKLMNAYPSYISPIGCLPAHLLGDMWG  
16 RFWTNLYSLTVPFGQKPNIDVTDAMVDQAWDAQRIFKEAEKFFVSVGLPNMTQGFWE  
17 NSMLTDPGNVQKAVCHPTAWDLGKGDFRILMCTKVTMDDFLTAHHEMGHIQYDMAY  
18 AAQPFLLRNGANEGFHEAVGEIMSLSAATPKHLKSIGLLSPDFQEDNETEINFLKQALTI  
19 VGTLPFTYMLEKWRWMVFKGEIPKDQWMKKWWEMKREIVGVVEPVPHDETYCDPAS  
20 LFHVSNDYSFIRYYTRTLYQFQFQEALCQAAKHEGPLHKCDISNSTEAGQKLFNMLRLG  
21 KSEPWTLAENVVGAKNMNV RPLLNYFEPLFTWLKDQNKNSFVGWSTDWSPYAD  
22

1  
2  
3  
4  
5  
6  
7  
8  
9  
10  
11  
12  
13  
14  
15  
16  
17  
18  
19  
20  
21  
22

**Signal Peptide**

*Hexa-His tag*

**TEV Site**

ACE2

**COV2-2449-LC-ACE2 Fusion**

**MGWSCILFLVATATGVHS**DIVMTQSPDSLAVSLGERATINCKSSQSLLYTSNNKNYLA  
WYQQKPGQPPKLLIYWASTRESGVPDRFSGSGSGTDFTLTISLQAEDVAVYYCQQYYYS  
PPWTFGQGTKVEIKRTVAAPSVFIFPPSDEQLKSGTASVVCLLNNFYPREAKVQWKVDN  
ALQSGNSQESVTEQDSKDYSLSSSTLTLSKADYEKHKVYACEVTHQGLSSPVTKSFNR  
GECGGSGSHHHHHHASTGGGSGGSPGQAGAAASEENLYFQGSLFVSNHAYGGSGGEA  
RVSTIEEQAKTFLDKFNHEAEDLFYQSSLASWNYNTNITEENVQNMNAGDKWSAFLK  
EQSTLAQMYPLQEIQNLTVKLQLOALQONGSSVLSEDKSKRLNTILNTMSTIYSTGKVC  
NPDNPQECLLLEPGLNEIMANSLDYNERLWAWESWRSEVGKQLRPLYEEYVVLKNEM  
ARANHYEDYGDYWRGDYEVNGVDGYDYSRGQLIEDVEHTFEEIKPLYEHLHAYVRAK  
LMNAYPSYISPIGCLPAHLLGDMWGRFWTNLYSLTVPFGQKPNIDVTDAMVDQAWDA  
QRIFKEAEKFFVSVGLPNMTQGFWENSMLTDPGNVQKAVCHPTAWDLGKGDFRILMCT  
KVTMDDFLTAHHEMIGHIQYDMAYAAQPFLLRNGANEGFHEAVGEIMSLSAATPKHLK  
SIGLLSPDFQEDNETEINFLKQALTIVGTLPTFTYMLEKWRWMVFKGEIPKDQWMKKW  
WEMKREIVGVVEPVPHDETYCDPASLFHVSNDYSFIRYYTRTLYQFQFQEALCQAAKHE

1 GPLHKCDISNSTEAGQKLFNMLRLGKSEPWTLALENVVGAKNMNVRPLLNYFEPLFTW

2 LKDQNKNSFVGWSTDWSPYAD

3

4 **Signal Peptide**

5 **Knob/Hole Mutations**

6 CrossMAb Swaps

7

8 **COV2-2449-HC-Knob**

9

10 **MGWSCILFLVATATGVHS**QVQLVESGGGVVQPGRSLRLSCATSGFTFSSFALHWVRQ

11 APGKGLEWVTVISDDGNNKYYVDSVKGRFTISRDNKNTLFLQMNSLRVEDTAIYYCA

12 RASYNSNWSIGEYFRDWGQGTLVTVSSASTKGPSVFPLAPSSKSTSGGTAALGCLVKDY

13 FPEPVTVSWNSGALTSGVHTFPAVLQSSGLYSLSSVVTVPSSSLGTQTYICNVNHKPSNT

14 KVDKKVEPKSCDKTHTCPPCPAPELLGGPSVFLFPPKPKDTLMISRTPEVTCVVVDVSH

15 DPEVKFNWYVDGVEVHNAKTKPREEQYNSTYRVVSVLTVLHQDWLNGKEYKCKVSN

16 KALPAPIEKTISKAKGQPREPQVYTLPPCRDELTKNQVSLICLVKGFYPSDIAVEWESNG

17 QPENNYKTTTPVLDSGSSFLYSKLTVDKSRWQQGNVDFSCSVMHEALHNHYTQKSLSL

18 SPGK

19

20 **CV10-LC-CrossMAb**

21

22 **MGWSCILFLVATATGVHSE**IVLTQSPGTLSPGERATLSCRASQSVSSIYLAWEYQQK

23 PGQAPRLLIYGASSRATGIPDRFSGSGSGTDFTLTISRLEPEDFAVYYCQQYAGSPWTFGQ



1 GTKVEIKSSASTKGPSVFPLAPSSKSTSGGTAALGCLVKDYFPEPVTVSWNSGALTSGVH  
2 TFPAVLQSSGLYSLSSVTVPSSSLGTQTYICNVNHKPSNTKVDKKVEPKSC  
3  
4 **CV10-HC-CrossMAb-Hole**  
5  
6 MGWSCIILFLVATATGVHSQVQLQESGPGLVKPSSETLSLTCNVSGGSISSYYWSWIRQP  
7 PGKGLEWIGYIYYSGSTNYPNPSLKSRVTISVDTSKNQFSLKLSSVTAADTAVYYCARGFD  
8 YWGQGTLVTVSSASVAAPSVFIFPPSDEQLKSGTASVVCLLNNFYPREAKVQWKVDNA  
9 LQSGNSQESVTEQDSKDYSLSSSTLTLSKADYEKHKVYACEVTHQGLSSPVTKSFNRG  
10 ECDKTHTCPPCPAPELLGGPSVFLFPPKPKDTLMISRTPEVTCVVVDVSHEDPEVKFNWY  
11 VDGVEVHNAKTKPREEQYNSTYRVVSVLTVLHQDWLNGKEYKCKVSNKALPAPIEKTI  
12 SKAKGQPREPQVCTLPPSRDELTKNQVSLSCAVKGFYPSDIAVEWESNGQPENNYKTP  
13 PVLDSGDGSFFLLSKLTVDKSRWQQGNVVFSCSVMHEALHNHYTQKSLSLSPGK  
14

1 Tables:

2

3 Supplementary Table 1 – live virus neutralization

| Inhibitor            | Wuhan-1<br>50% CPE<br>nM | BA.1 50%<br>CPE nM | BA.2 50%<br>CPE nM |
|----------------------|--------------------------|--------------------|--------------------|
| scFv-based ReconnAbs |                          |                    |                    |
| CV10                 | 8.1                      | 29                 | 56                 |
| CV27                 | 3.3                      | 306                | 211                |
| 2449                 | 10                       | 101                | 57                 |
| IgG-based ReconnAb   |                          |                    |                    |
| CrossMab             | 21                       | 171                | 106                |
| CrossMab<br>+ TEV    | 375                      | 346                | >500.00            |
| Scale                |                          |                    |                    |
| <200nM               | >200nM                   |                    |                    |

4

5 Supplementary Table 1 – IC<sub>50</sub> values from a limiting dilution live SARS-CoV-2 neutralization assay shows ReconnAbs  
 6 neutralize live viruses as expected. Cytopathic effect (CPE) was scored as binary, either infection or no infection and  
 7 IC<sub>50</sub> was calculated using the Spearman-Kärber method. Data presented is the average of 3 assays, if one assay was  
 8 above the limit of detection, the average was computed assuming the limit of detection was the value.
